# Supplementary material for: High-performance Si@C anode for lithium-ion batteries enabled by a novel structuring strategy
Source: Royal Society of Chemistry journal article supplement (doi:10.1039/d3nr02723f), 2023-01-01
Supplement: d3nr02723f1.pdf [file d3nr02723f1.pdf]

*Supporting Information*

**High-performance Si@C anode for lithium-ion batteries enabled by a novel structuring  
strategy**

*Jian Song<sup>a</sup>, Shengfeng Ke<sup>a</sup>, Pengkai Sun<sup>a</sup>, Dian Yang<sup>a</sup>, Chengang Luo<sup>a</sup>, Qinghua Tian<sup>a\*</sup>,*

*Liang Cui<sup>a</sup> and Jizhang Chen<sup>b</sup>*

*<sup>a</sup>Key Laboratory of Surface & Interface Science of Polymer Materials of Zhejiang Province,*

*School of Chemistry and Chemical Engineering, Zhejiang Sci-Tech University,*

*Hangzhou, 310018, P. R. China*

*<sup>b</sup>College of Materials Science and Engineering, Nanjing Forestry University,*

*Nanjing, 210037, P. R. China*

*\*Corresponding author e-mail addresses: 09tqinghua@163.com*

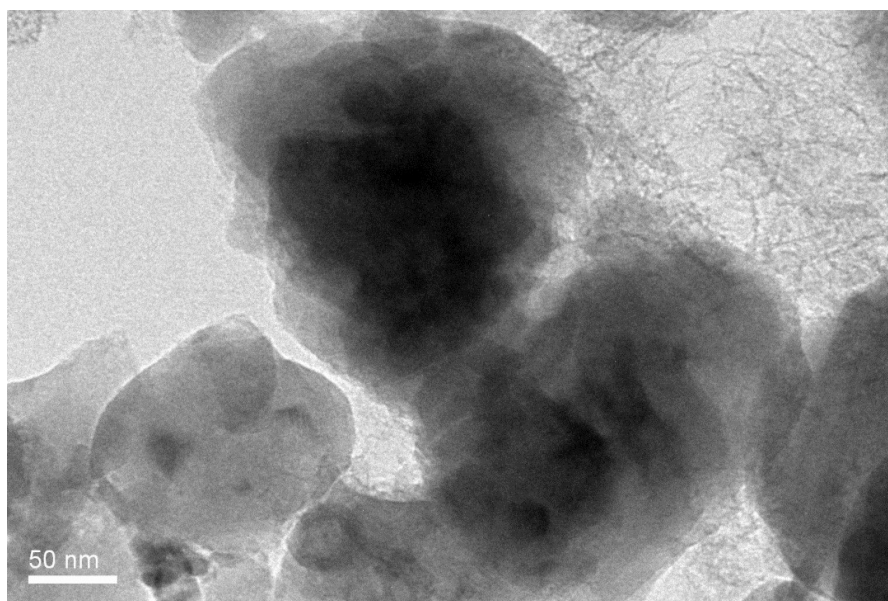

**Fig. S1** TEM image of Si@FeNO.

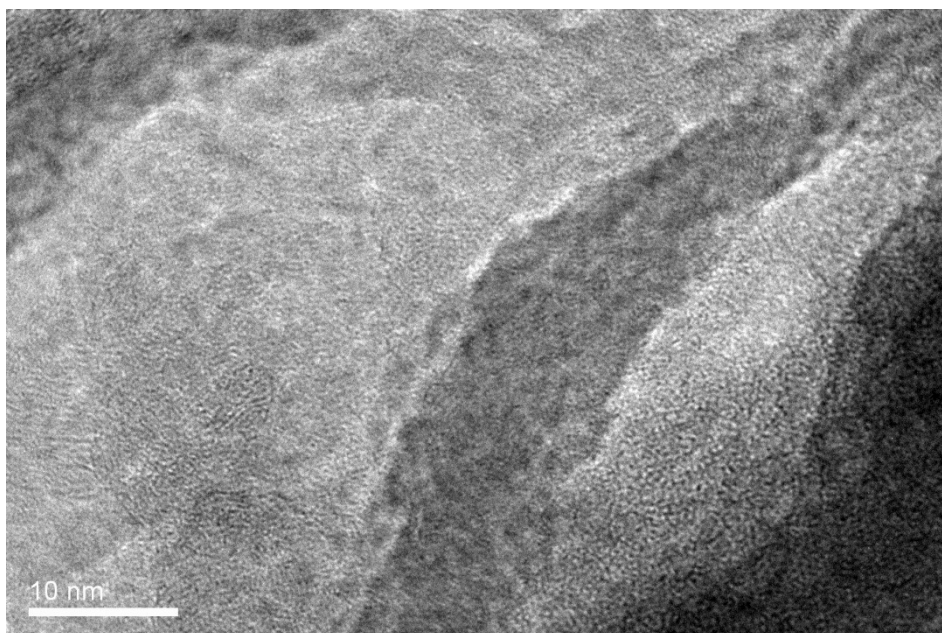

**Fig. S2** TEM image of PVP-derived carbon in Si@P.

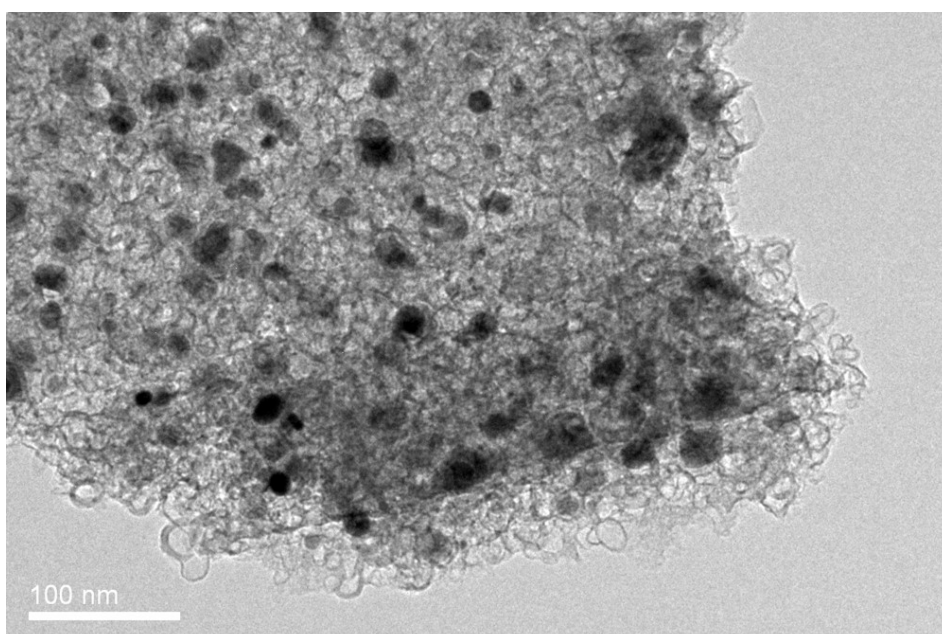

**Fig. S3** TEM image of FeNO@P.

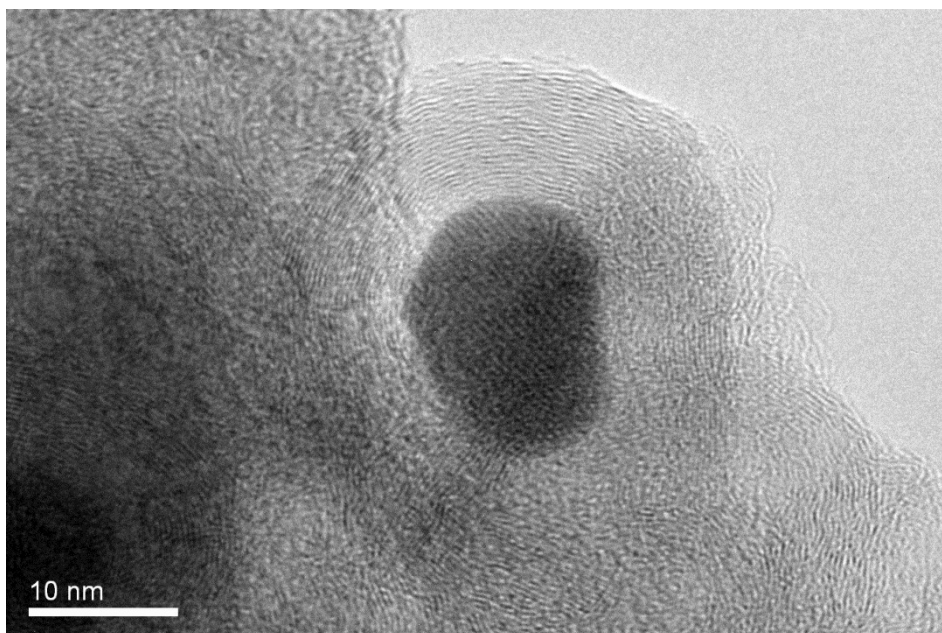

*Fig. S4 HRTEM image of FeNO@P.*

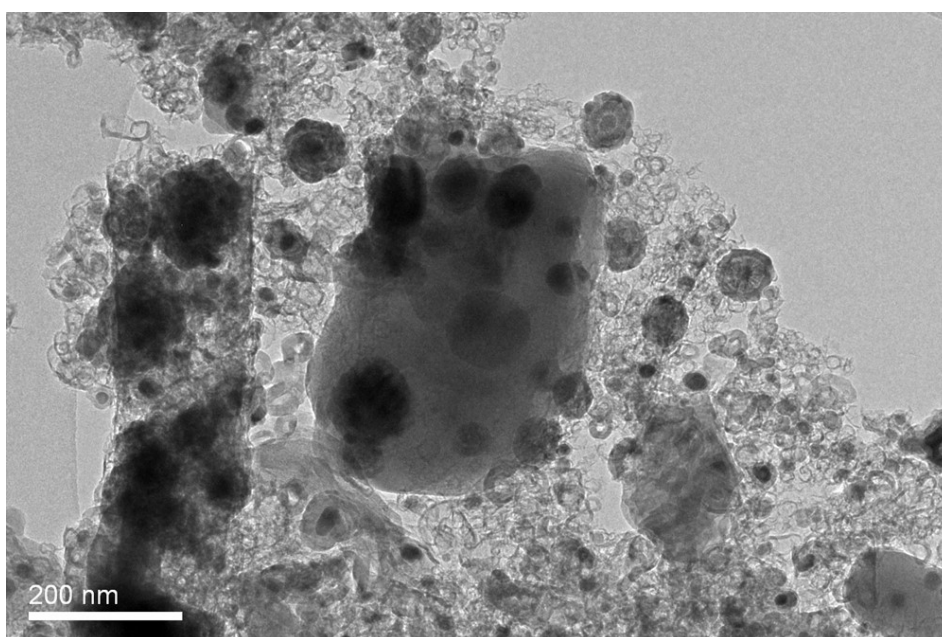

*Fig. S5 TEM image of Si@FeNO@P.*

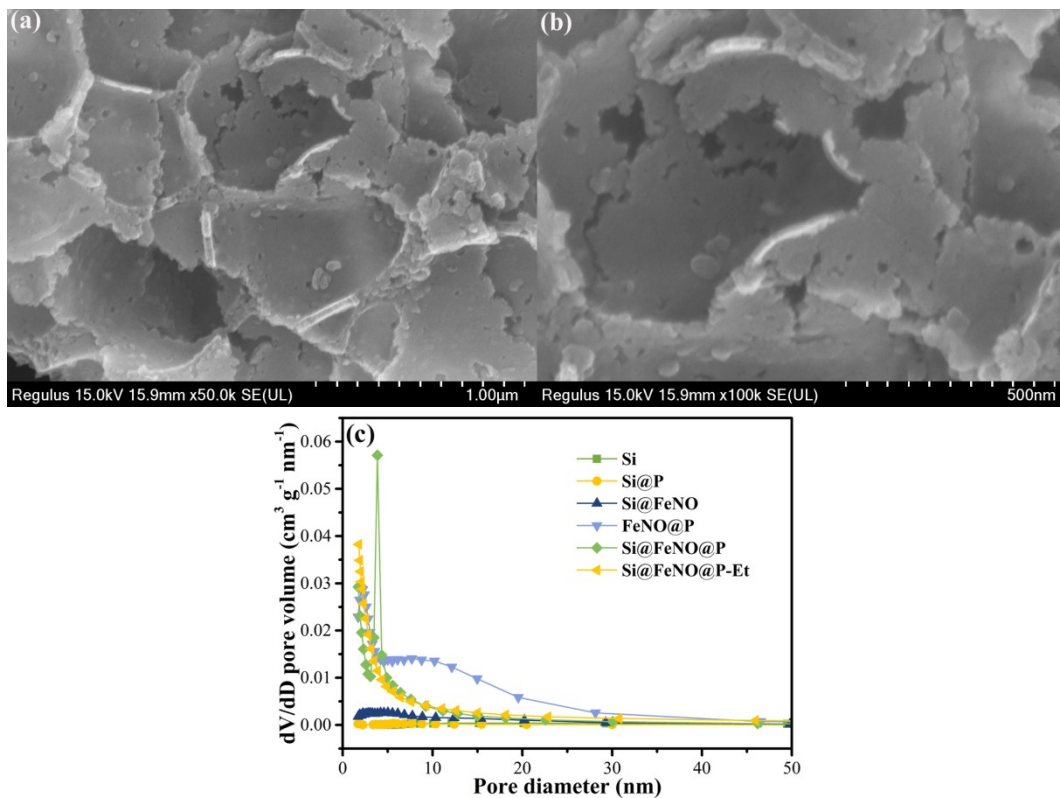

**Fig. S6** SEM images of Si@FeNO@P with (a) 50K and (b) 100K magnifications. (c) Pore size distribution curves of different samples.

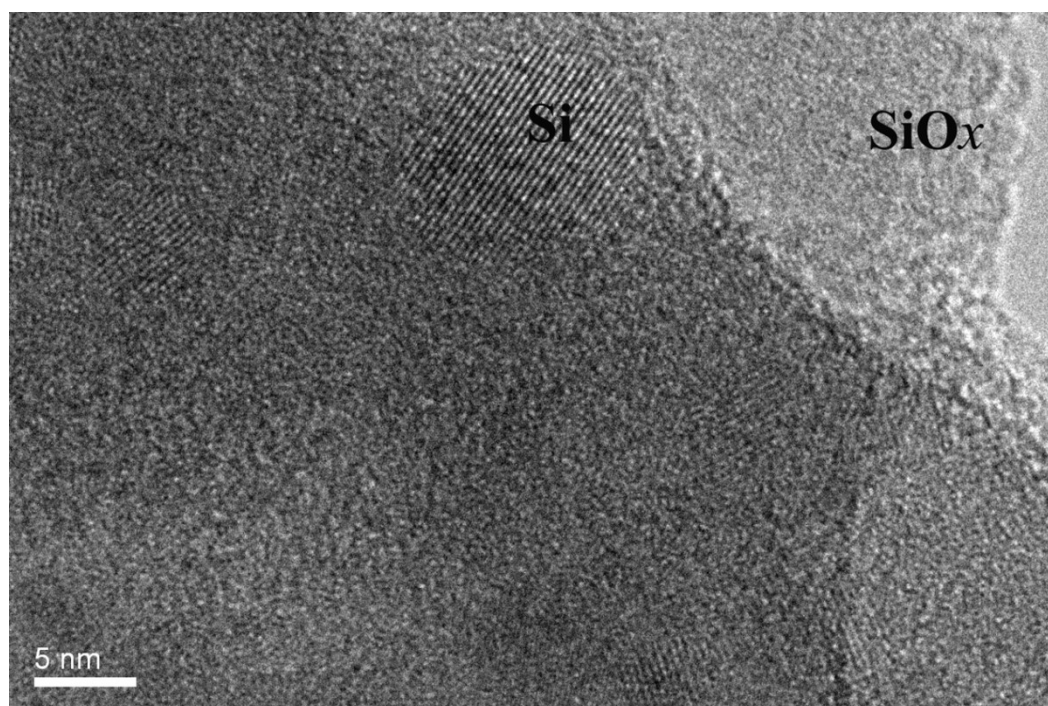

**Fig. S7** HRTEM image of the pure Si nanoparticles.

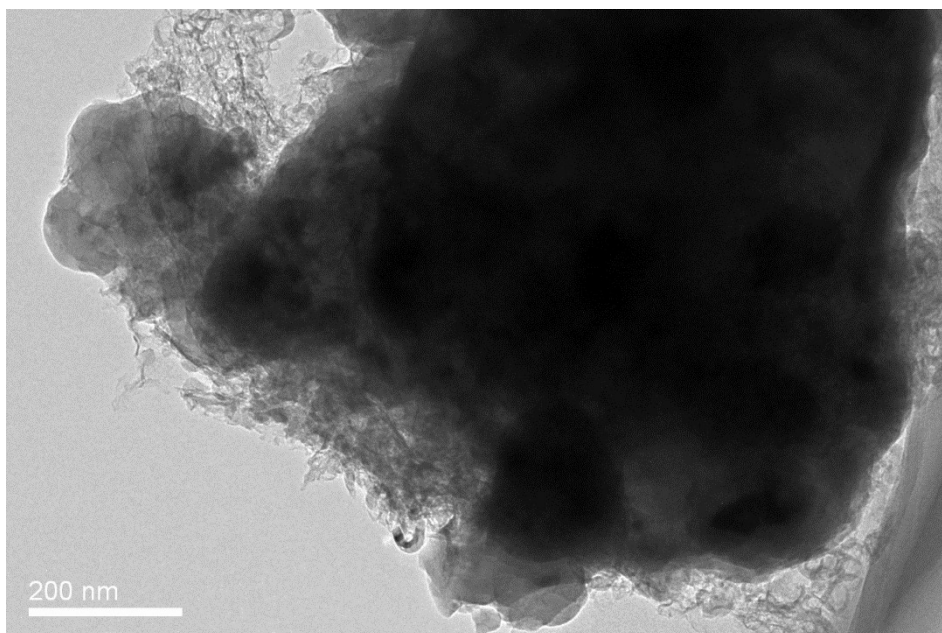

**Fig. S8** TEM image of Si@FeNO@P-Et.

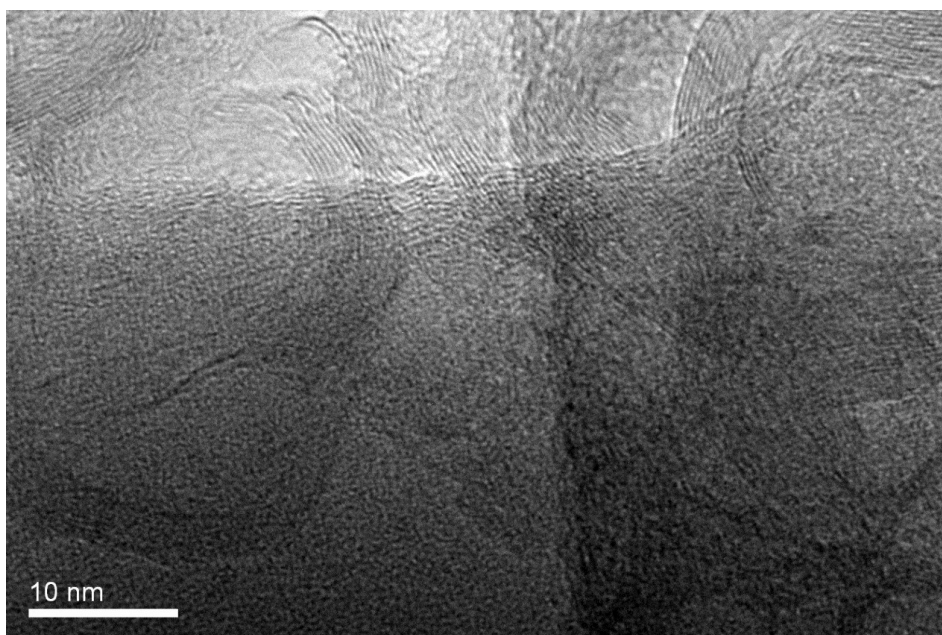

**Fig. S9** HRTEM image of carbon of Si@FeNO@P-Et.

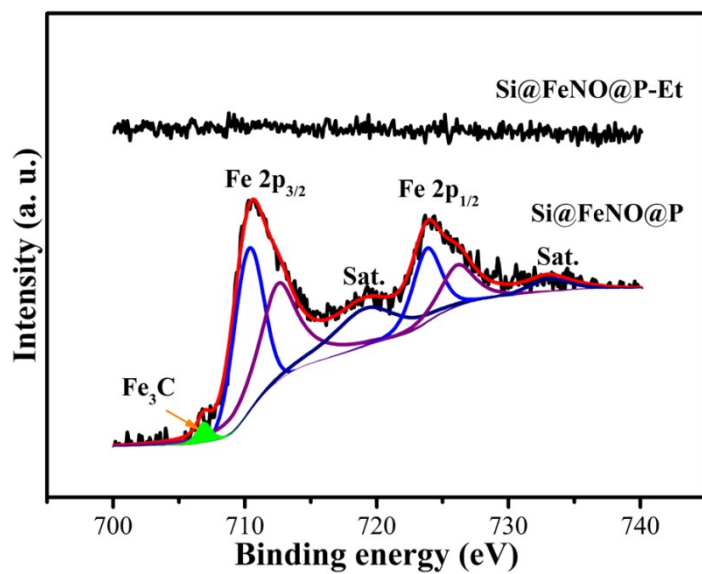

**Fig. S10** Fe 2p HRXPS spectra of Si@FeNO@P and Si@FeNO@P-Et.

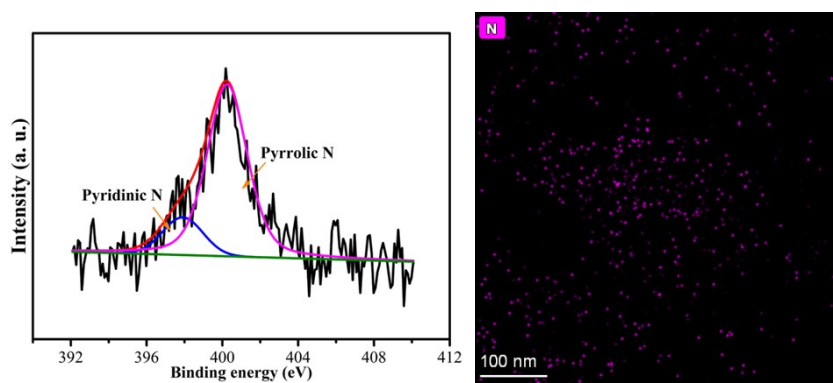

**Fig. S11** N 1s HRXPS spectra and N elemental mapping (based on Fig. 2j) of Si@FeNO@P.

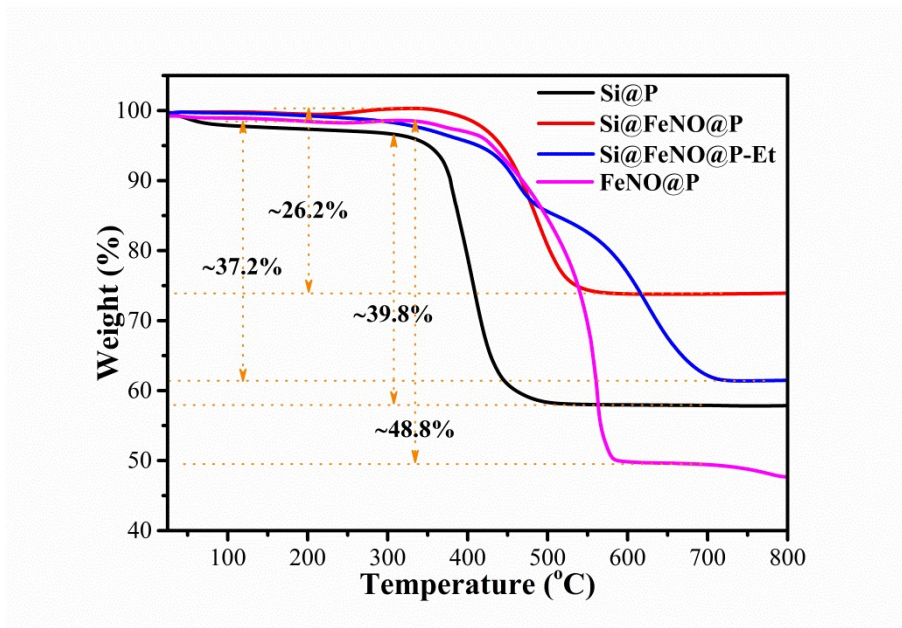

Fig. S12 TG curves of different samples at 10 °C/min from room temperature to 800 °C.

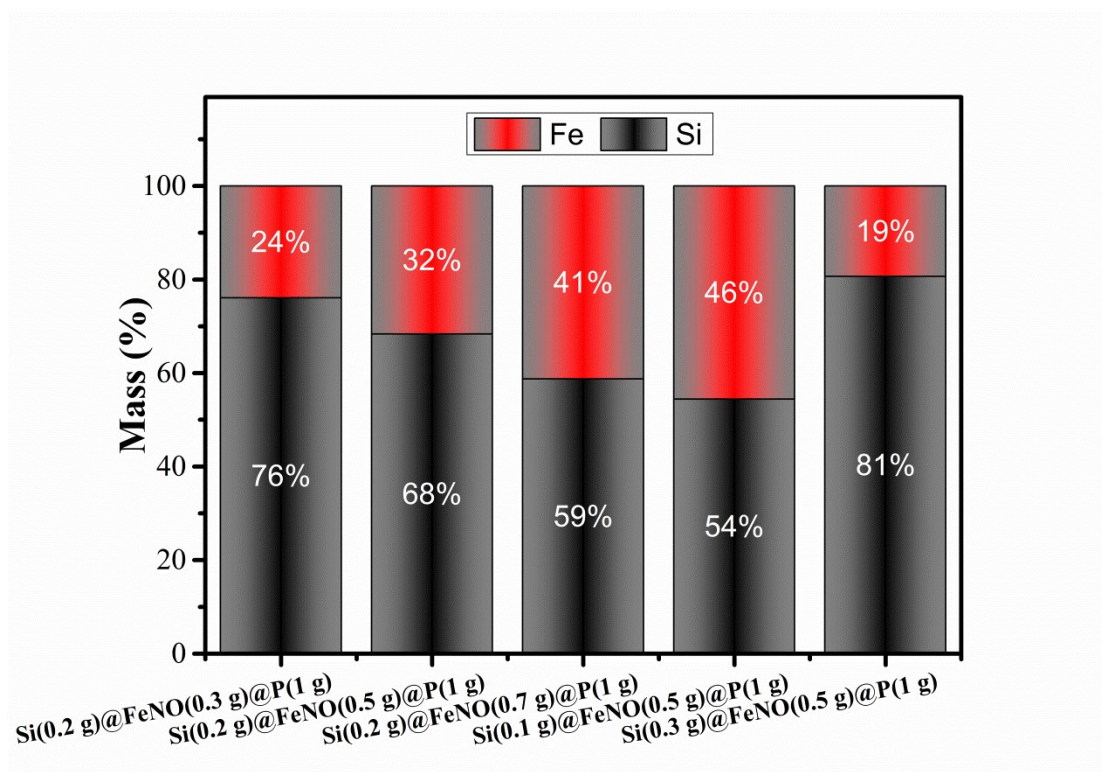

Fig. S13 Mass ratios of Fe to Si of different samples obtained ICP characterization.

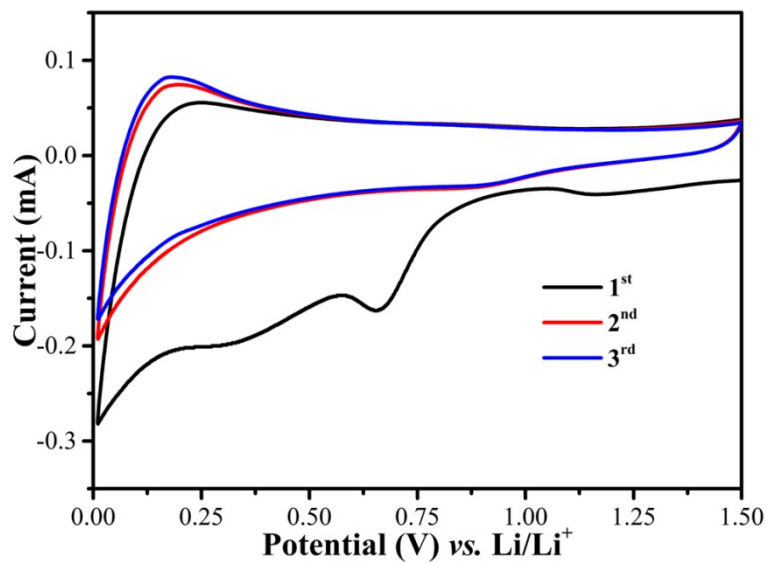

**Fig. S14** CVs of FeNO@P at  $0.3 \text{ mV s}^{-1}$  between 0.01 and 1.5 V.

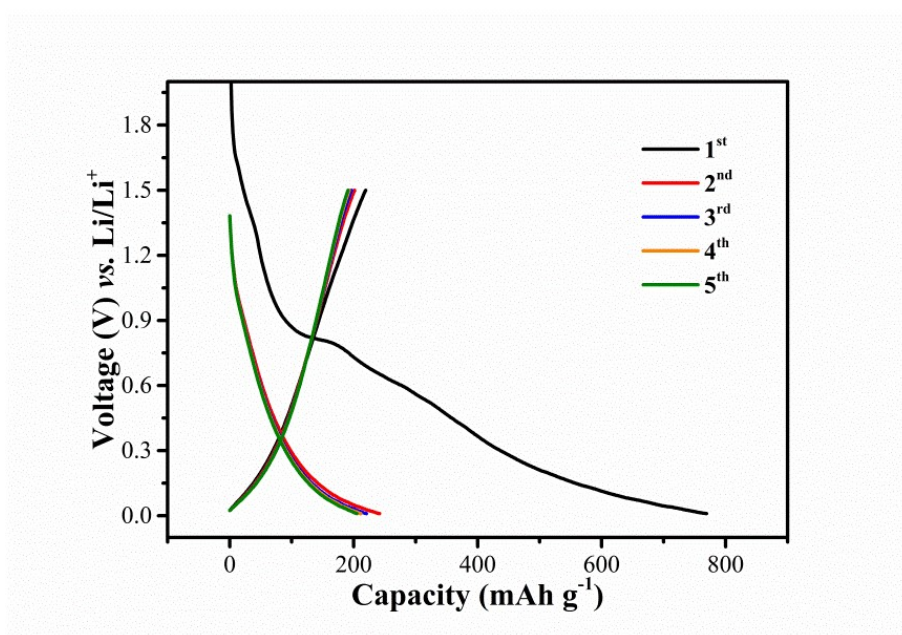

**Fig. S15** Galvanostatic charge/discharge profiles of FeNO@P at  $100 \text{ mA g}^{-1}$ .



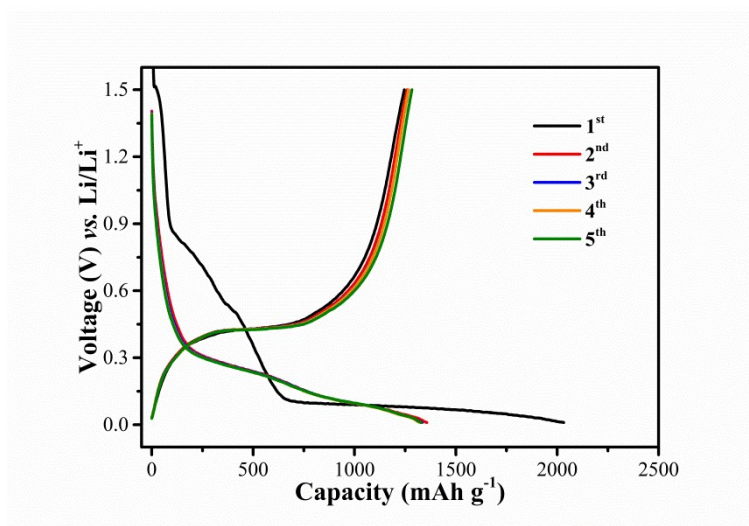

**Fig. S16** Galvanostatic charge/discharge profiles of Si@FeNO at 100 mA g<sup>-1</sup>.

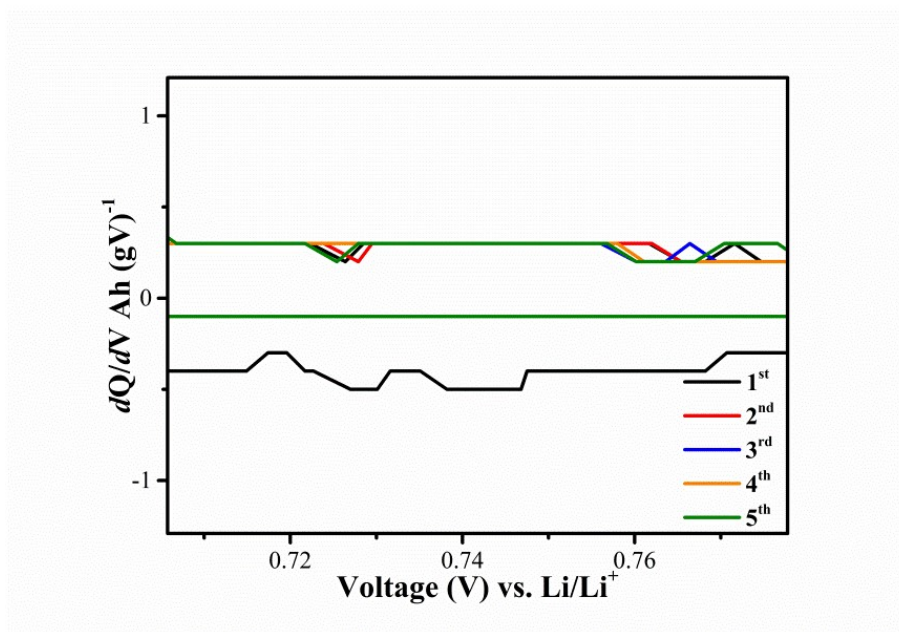

**Fig. S17** Magnified fragment of  $dQ/dV$  plots of the Si@FeNO@P.

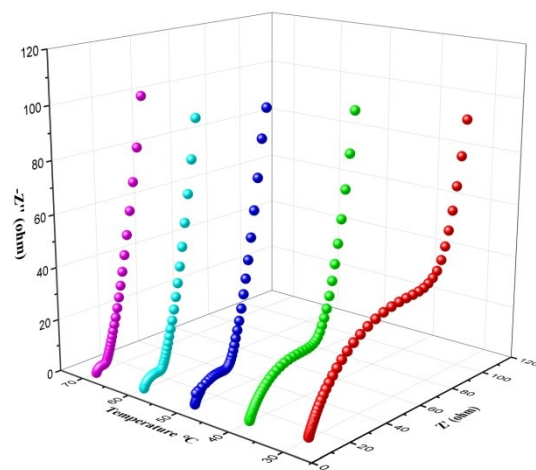

**Fig. S18** EIS plots of the Si electrode at different temperatures.

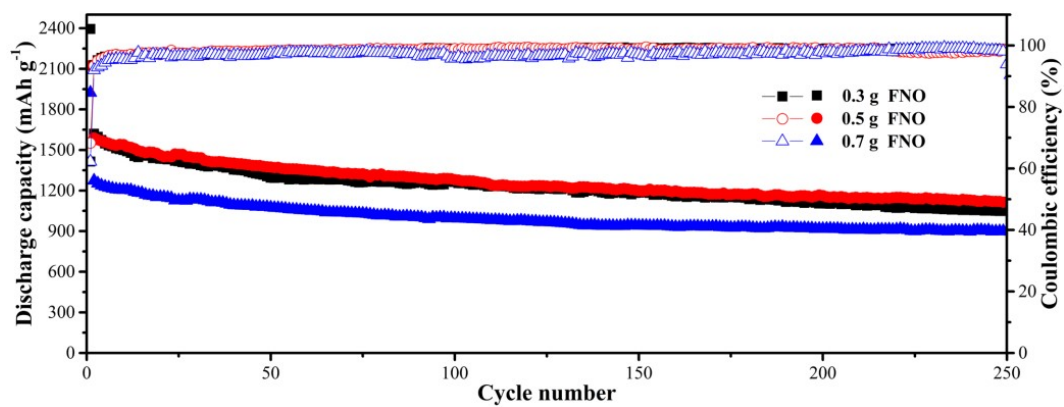

**Fig. S19** Cycling performance of samples prepared with different dosage of  $\text{Fe}(\text{NO}_3)_3$  at  $0.1 \text{ A g}^{-1}$ .

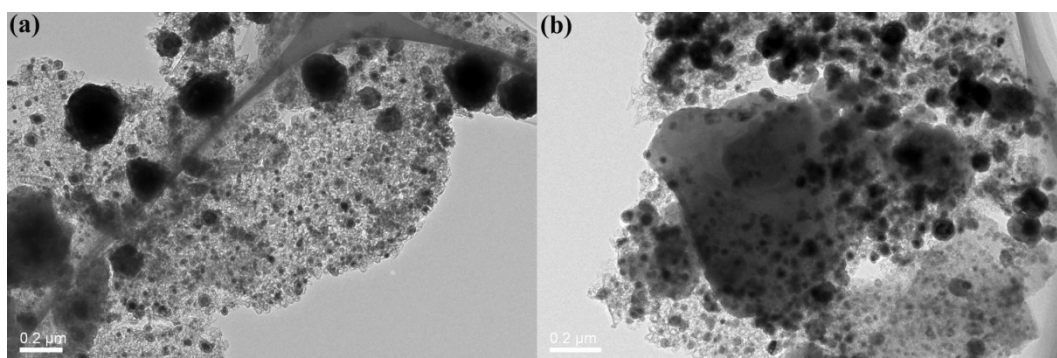

**Fig. S20** TEM images of samples prepared with (a) 0.3 g and (b) 0.7 g of  $\text{Fe}(\text{NO}_3)_3$ .

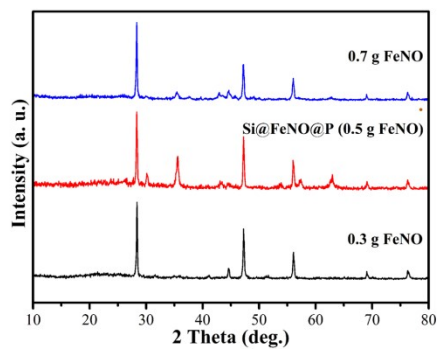

**Fig. S21** XRD patterns of samples prepared with different dosage of  $\text{Fe}(\text{NO}_3)_3$ .

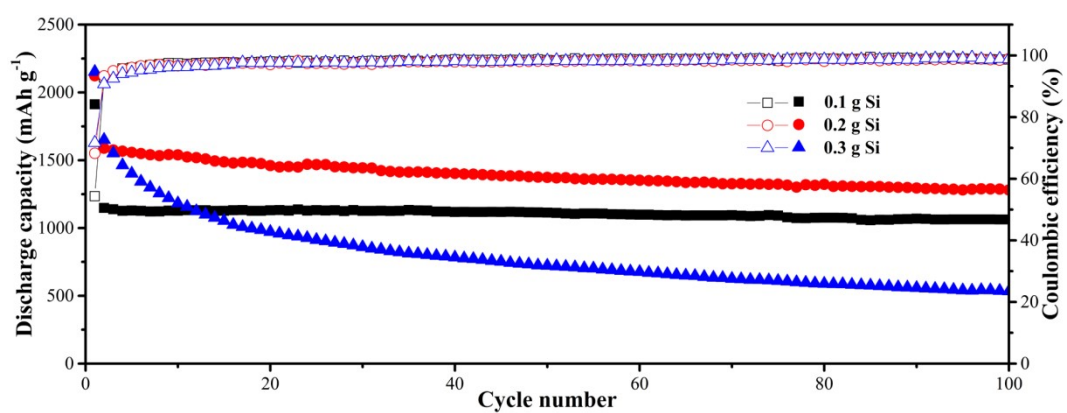

**Fig. S22** Cycling performance of samples prepared with different dosage of Si at  $100 \text{ mA g}^{-1}$ .

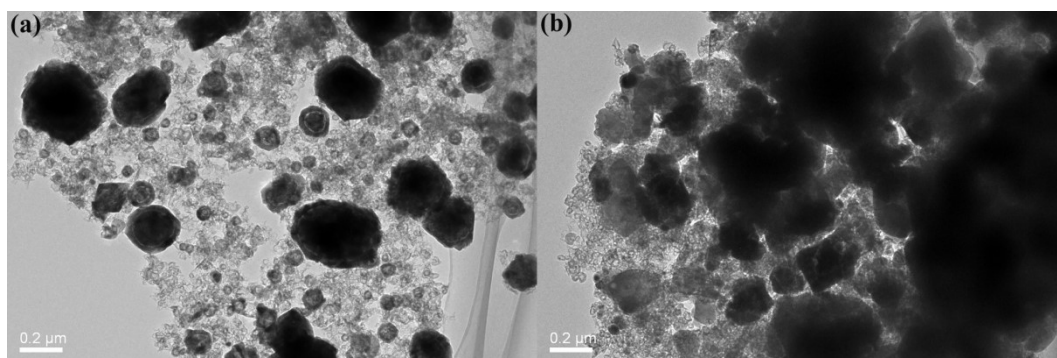

**Fig. S23** TEM images of samples prepared with (a) 0.1 g and (b) 0.3 g of Si.

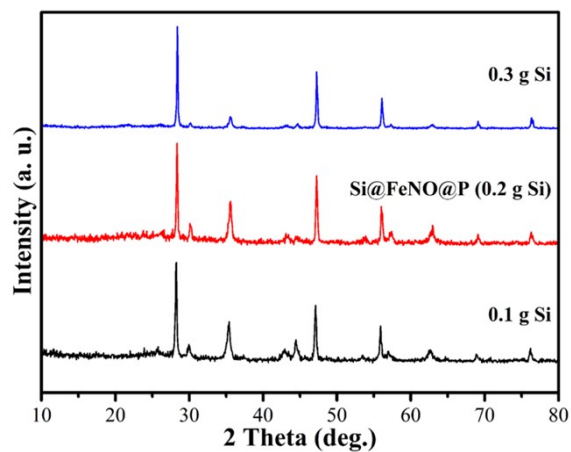

*Fig. S24* XRD patterns of samples prepared with different dosage of Si.

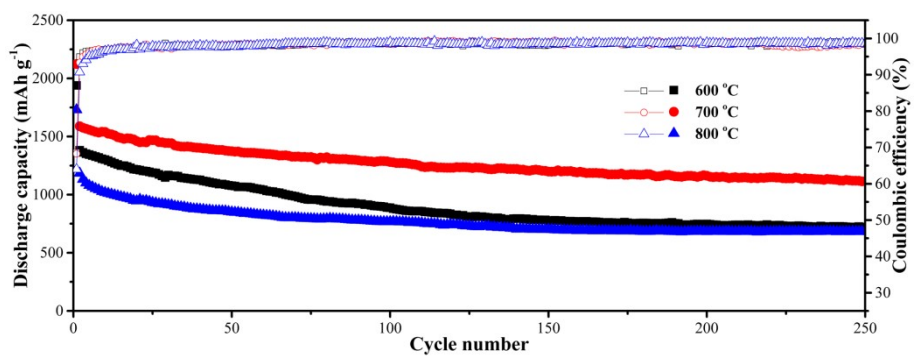

*Fig. S25* Cycling performance of samples prepared with different carbonization temperatures at  $100 \text{ mA g}^{-1}$ .

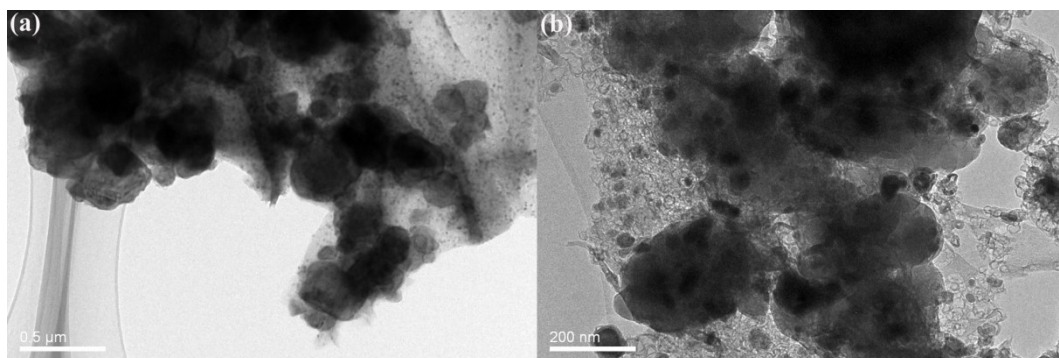

*Fig. S26* TEM images of samples prepared at (a)  $600 \text{ }^\circ\text{C}$  and (b)  $800 \text{ }^\circ\text{C}$ .

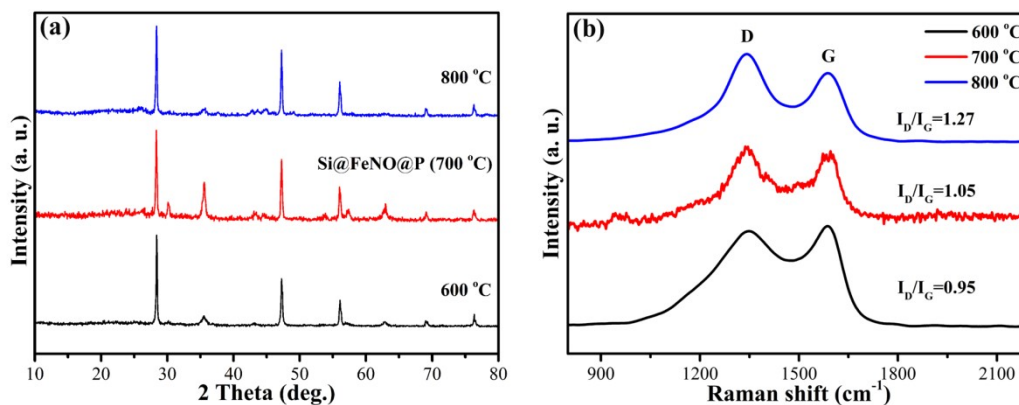

**Fig. S27** (a) XRD patterns and (b) Raman spectra of samples prepared with different carbonization temperatures.

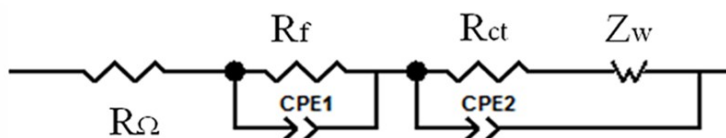

**Fig. S28** An equivalent circuit.

In the equivalent circuit diagram the  $R_{\Omega}$ ,  $R_f$ ,  $R_{ct}$ , CPE, and  $Z_w$  represent the ohmic resistance, ionic resistance at the SEI layer, charge transfer resistance, constant phase-angle element, and Warburg impedance, respectively [26].

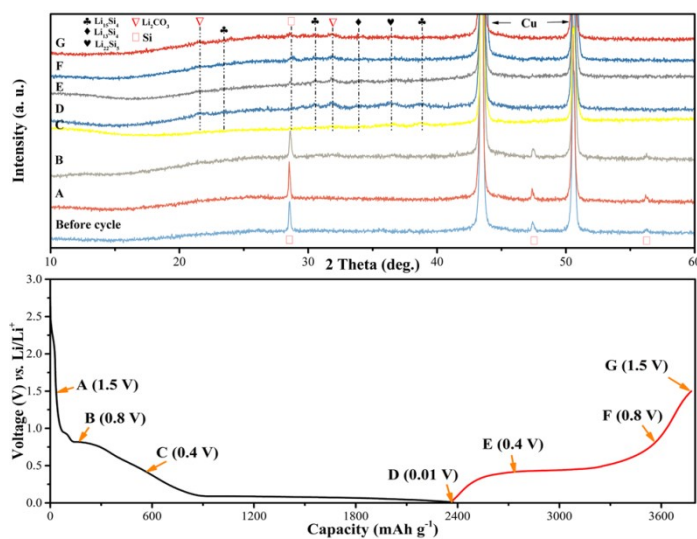

**Fig. S29** XRD patterns of the Si@FeNO@P electrode under different electrochemical states during the first cycle at  $100 mA g^{-1}$ .

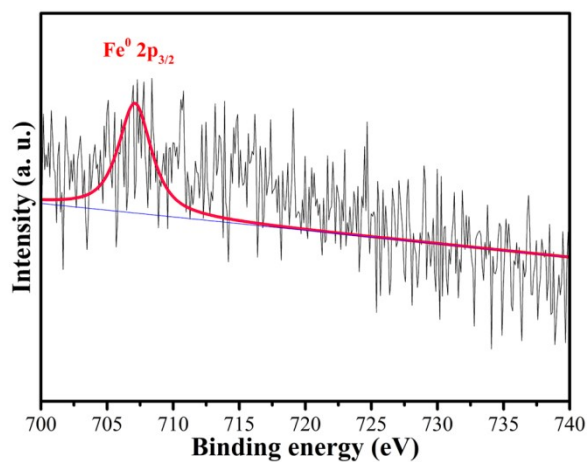

**Fig. S30** High-resolution XPS spectrum of the Fe 2p of the Si@FeNO@P after 50 cycles at 100  $\text{mA g}^{-1}$ .

For assembling full battery, the commercial LFP electrode was employed as the cathode and the as-prepared Si@FeNO@P electrode as the anode. The Si@FeNO@P anodes were activated for two cycles with lithium metal counter electrode at 100  $\text{mA g}^{-1}$  between 0.01 and 1.5 V before assembling the full battery. The galvanostatic charge/discharge test of the as-assembled full battery was achieved at 0.1 C between 1 and 4.2 V based on a LAND CT2001a cell test system.

**Table S1.** The lithium storage comparison of the Si@FeNO@P with other Si/C-based composites

| Si/C-based anode materials                  | Potential cutoff (V) | Current density (mA <sub>g</sub> <sup>-1</sup> ) | Cycles | Capacity (mAh <sub>g</sub> <sup>-1</sup> ) | Reference |
|---------------------------------------------|----------------------|--------------------------------------------------|--------|--------------------------------------------|-----------|
| Si@FeNO@P                                   | 1.5-0.01             | 100                                              | 250    | 1116.1                                     | This work |
| Si@FeNO@P                                   | 1.5-0.01             | 1000                                             | 500    | 858.1                                      | This work |
| Si@FeNO@P                                   | 1.5-0.01             | 5000                                             | 500    | 503.1                                      | This work |
| CNT/Fe@Si@SiO <sub>2</sub>                  | 1.0-0.01             | 1000                                             | 500    | 968                                        | [1]       |
| C/Si@SnO <sub>2</sub>                       | 3.0-0.01             | 100                                              | 200    | 919.21                                     | [2]       |
| N-doped TiO <sub>2</sub> /Si/C              | 3.0-0.001            | 100                                              | 80     | 538                                        | [3]       |
| Si@Co-NC                                    | 2.0-0.005            | 100                                              | 80     | 775.5                                      | [4]       |
| Si@Co-C                                     | 3.0-0.01             | 1000                                             | 500    | 650                                        | [5]       |
| Si@C/TiO <sub>2</sub> @C/HC                 | 3.0-0.01             | 1000                                             | 400    | 558                                        | [6]       |
| Si@Fe <sub>2</sub> O <sub>3</sub> /C        | 2.0-0.01             | 1000                                             | 300    | 680.7                                      | [7]       |
| Si@Ni-NP/CNTs                               | 1.5-0.01             | 100                                              | 100    | 1008                                       | [8]       |
| Si@TiO <sub>2</sub> @rGO                    | 3.0-0.01             | 200                                              | 100    | 1135.1                                     | [9]       |
| Si@TiO <sub>2</sub> -B/CNTs                 | 2.5-0.01             | 200                                              | 100    | 1184                                       | [10]      |
| Si@void C@TiO <sub>2</sub>                  | 2.5-0.01             | 100                                              | 500    | 668                                        | [11]      |
| Si@WO <sub>3</sub> @C                       | 3.0-0.01             | 1000                                             | 100    | 610                                        | [12]      |
| Si/Ge/G@C                                   | 3-0.01               | 100                                              | 100    | 706                                        | [13]      |
| Si-Mn/C                                     | 2-0.01               | 1000                                             | 100    | 960                                        | [14]      |
| Si/Mxene@Zn-C                               | 3-0.01               | 100                                              | 150    | 862.9                                      | [15]      |
| SiO <sub>x</sub> -TiO <sub>2</sub> /Si/CNTs | 2.5-0.005            | 100                                              | 100    | 800                                        | [16]      |
| Si/Sb/Sb <sub>2</sub> O <sub>3</sub> /G@C   | 3-0.01               | 1000                                             | 180    | 567.8                                      | [17]      |
| Si/Sn@SiO <sub>x</sub> -C                   | 1.5-0.01             | 500                                              | 100    | 1102                                       | [18]      |
| Si/TiSi <sub>2</sub> /G@C                   | 1.5-0.01             | 800                                              | 120    | 943.8                                      | [19]      |
| ZnO/Si/PC                                   | 3-0.01               | 1000                                             | 300    | 500                                        | [20]      |
| T <sub>12</sub> -Si/C                       | 3-0.01               | 200                                              | 100    | 1449.2                                     | [21]      |
| Si@LT-4-5                                   | 3-0.01               | 500                                              | 150    | 888                                        | [22]      |
| Graphene/IOC@Si                             | 1.5-0.005            | 1000                                             | 450    | 484                                        | [23]      |
| Si-M1                                       | 1.2-0.1              | 1000                                             | 100    | 2522.6                                     | [24]      |
| Si@CEG/C                                    | 1.5-0.01             | 1000                                             | 200    | 963.8                                      | [25]      |

## References

- [1] M. Zhang, L. Li, X. Jian, et al. Free-standing and flexible CNT/(Fe@Si@SiO<sub>2</sub>) composite anodes with kernel-pulp-skin nanostructure for high-performance lithium-ion batteries [J]. *J. Alloys Compd.*, 2021, 878: 160396.
- [2] S. Liu, W. Tao, Y. Yu, et al. Ball milling synthesis of robust sandwich-structured C/Si@SnO<sub>2</sub> anode with porous silicon buffer layer for fast charging lithium-ion battery [J].

Colloids Surf., A, 2022, 654: 130088.

- [3] S. Xie, Q. Ji, Y. Xia, et al. Mutual performance enhancement within dual n - doped TiO<sub>2</sub>/Si/C nanohybrid lithium - ion battery anode [J]. ChemistrySelect, 2021, 6(2): 141-53.
- [4] Q. Li, Y. Wang, J. Yu, et al. High-performance Si-containing anode materials in lithium-ion batteries: a superstructure of Si@Co-NC composite works effectively [J]. Green Energy Environ., 2022, 7(1): 116-29.
- [5] J. Yan, C. Gao, S. Qi, et al. Encapsulation of nano-Si into MOF glass to enhance lithium-ion battery anode performances [J]. Nano Energy, 2022, 103: 107779.
- [6] Y. Li, G. Chen, J. Lin, et al. Si@C/TiO<sub>2</sub>@C/hollow-C nanocomposite as a lithium-Ion battery anode produced by refining silicon and Ti-6Al-4V residuals [J]. ACS Appl. Energy Mater., 2021, 4(12): 14526-36.
- [7] Q. Wang, C. Guo, J. He, et al. Fe<sub>2</sub>O<sub>3</sub>/C-modified Si nanoparticles as anode material for high-performance lithium-ion batteries [J]. J. Alloys Compd., 2019, 795: 284-90.
- [8] Y.-Q. Wang, X.-X. Yang, M.-X. Ren, et al. 3D CNTs networks enable core-shell structured Si@Ni nanoparticle anodes with enhanced reversible capacity and cyclic performance for lithium ion batteries [J]. Int. J. Hydrogen Energy, 2021, 46(29): 16179-87.
- [9] R. Fang, C. Miao, H. Mou, et al. Facile synthesis of Si@TiO<sub>2</sub>@rGO composite with sandwich-like nanostructure as superior performance anodes for lithium ion batteries [J]. J. Alloys Compd., 2020, 818: 152884.
- [10] N. Zhou, Y. Wu, Y. Li, et al. Interconnected structure Si@TiO<sub>2</sub>-B/CNTs composite anode applied for high-energy lithium-ion batteries [J]. Appl. Surf. Sci., 2020, 500: 144026.
- [11] L. Hou, R. Cui, S. Xiong, et al. A multilayered sturdy shell protects silicon nanoparticle



- Si@void C@TiO<sub>2</sub> as an advanced lithium ion battery anode [J]. *Phys. Chem. Chem. Phys.*, 2021, 23(6): 3934-41.
- [12] Y. Liu, R. Guo, H. Zhu, et al. A novel propeller-like Si@WO<sub>3</sub>@C with boosted electrochemical properties as anode material for lithium-ion batteries [J]. *Vacuum*, 2021, 184: 109922.
- [13] Z. Li, K. Zhang, M. Ma, et al. Facile fabrication of Si/Ge/G@C composite electrodes for high performance lithium-ion batteries [J]. *Silicon*, 2022.
- [14] S. Wang, T. Wang, Y. Zhong, et al. Structure and electrochemical properties of Si-Mn/C core-shell composites for lithium-ion batteries [J]. *Jom*, 2020, 72(8): 3037-45.
- [15] Zhang P, Chen J, Feng L, et al. Dual confinement of Si nanoparticles in a Mxene/ZIF-8-derived carbon framework for lithium-ion batteries[J]. *ACS Appl. Nano Mater.*, 2022, 5(9): 12720-12728.
- [16] J. Jiang, Y. Ou, Y. Jiang, et al. Preparation of SiO<sub>x</sub>-TiO<sub>2</sub>/Si/CNTs composite microspheres as novel anodes for lithium-ion battery with good cycle stability [J]. *J. Mater. Sci.: Mater. Electron.*, 2022, 33(14): 11025-37.
- [17] F. Sun, H. Feng, S. Gao, et al. Facile fabrication of Si/Sb/Sb<sub>2</sub>O<sub>3</sub>/G@C composite electrodes for high-performance li-ion batteries [J]. *New J. Chem.*, 2020, 44(10): 4122-8.
- [18] R. Miao, J. Zhu, S. Kang, et al. In-situ mechanochemical synthesis of sub-micro Si/Sn@SiO<sub>x</sub>-C composite as high-rate anode material for lithium-ion batteries [J]. *Electrochim. Acta*, 2021, 384: 138413.
- [19] Y. Zhang, M. Chen, Z. Chen, et al. A novel Si/TiSi<sub>2</sub>/G@C composite as anode material with excellent lithium storage performances [J]. *Mater. Lett.*, 2021, 299: 130078.

- [20] X. Sun, J. Gao, C. Wang, et al. A hybrid ZnO/Si/porous-carbon anode for high performance lithium ion battery [J]. Chem. Eng. J., 2020, 383: 123198.
- [21] X. Lin, A. Li, D. Li, et al. Facile fabrication of high-performance Si/C anode materials via AlCl<sub>3</sub>-assisted magnesiothermic reduction of phenyl-rich polyhedral silsesquioxanes [J]. ACS Appl. Mater. Interfaces, 2020, 12: 15202–15210.
- [22] M. Liu, H. Gao, G. Hu, et al. Facile preparation of core-shell Si@Li<sub>4</sub>Ti<sub>5</sub>O<sub>12</sub> nanocomposite as large-capacity lithium-ion battery anode [J]. J. Energy Chem., 2020, 40: 89–98.
- [23] Y. Lu, Z. Ye, Y. Zhao, et al. Graphene supported double-layer carbon encapsulated silicon for high-performance lithium-ion battery anode materials [J]. Carbon, 2023, 201: 962–971.
- [24] J. Tang, F. Wu, X. Dai, Robust MXene adding enables the stable interface of silicon anodes for high-performance Li-ion batteries [J]. Chem. Eng. J., 2023, 452: 139139.
- [25] X. Liu, H. T. Liu, Y. H. Cao, et al. Silicon nanoparticles embedded in chemical-expanded graphite through electrostatic attraction for high-performance lithium-Ion batteries, ACS Appl. Mater. Interfaces, <https://doi.org/10.1021/acsami.2c21866>
- [26] X. L. Li, J. F. Zhu, Y. Fang, et al. Hydrothermal preparation of CoO/Ti<sub>3</sub>C<sub>2</sub> composite material for lithium-ion batteries with enhanced electrochemical performance [J]. J. Electroanal. Chem., 2018, 817: 1-8.

**Table S2** Comparison of lithium storage performance of the as-prepared samples at 100 mA g<sup>-1</sup>

| Samples      | C content (%) | Si content (%) | Initial discharge capacity (mAh g <sup>-1</sup> ) | ICE (%) | Reversible capacity (mAh g <sup>-1</sup> ) | Cycle retention (%) | Rate performance (mAh g <sup>-1</sup> @A g <sup>-1</sup> at 10 <sup>th</sup> cycle)                                                                                                             |
|--------------|---------------|----------------|---------------------------------------------------|---------|--------------------------------------------|---------------------|-------------------------------------------------------------------------------------------------------------------------------------------------------------------------------------------------|
| Si           | 0             | ~100           | 3837.7                                            | 80.8    | 460.9<br>(120 cycles)                      | 12.0                | <u>1546.7@0.1</u><br><u>1044.4@0.3</u><br><u>843.3@0.5</u><br><u>633.5@1</u><br><u>442.5@2</u><br><u>335.6@3</u><br><u>834@0.1</u><br><u>1024.4@0.1</u><br><u>856.9@0.3</u><br><u>753.7@0.5</u> |
| Si@P         | ~48.8         | ~51.2          | 1855.9                                            | 61.9    | 680.3<br>(180 cycles)                      | 36.7                | <u>655.3@1</u><br><u>557.1@2</u><br><u>504.8@3</u><br><u>795.1@0.1</u><br><u>1287.7@0.1</u><br><u>1127.4@0.3</u><br><u>1021.8@0.5</u>                                                           |
| Si@FeNO      | 0             | ~67.0          | 2031.8                                            | 61.3    | 974.5<br>(159 cycles)                      | 48.0                | <u>868.7@1</u><br><u>703.9@2</u><br><u>587.9@3</u><br><u>1106.4@0.1</u><br><u>1428.2@0.1</u><br><u>1305.6@0.3</u><br><u>1260.5@0.5</u>                                                          |
| Si@FeNO@P    | ~26.2         | ~44.6          | 2123.2                                            | 68.3    | 1116.1<br>(250 cycles)                     | 52.6                | <u>1149.8@1</u><br><u>1055.7@2</u><br><u>973.5@3</u><br><u>1260.8@0.1</u><br><u>1401.1@0.1</u><br><u>1226.2@0.3</u><br><u>1121.7@0.5</u>                                                        |
| Si@FeNO@P-Et | ~37.2         | ~62.8          | 2206.1                                            | 69.5    | 839.5<br>(175 cycles)                      | 38.1                | <u>1011.6@1</u><br><u>881.3@2</u><br><u>771.6@3</u><br><u>1090.3@0.1</u><br><u>217.9@0.1</u><br><u>183.6@0.3</u><br><u>167.1@0.5</u>                                                            |
| FeNO@P       | ~48.8         | 0              | 769.1                                             | 28.5    | 180.3<br>(250 cycles)                      | 3.7                 | <u>144.2@1</u><br><u>121@2</u><br><u>104.1@3</u><br><u>206.2@0.1</u>                                                                                                                            |
